# Supplementary material
Source: PubMed Central journal article supplement (PMC7554133)

# Original Western Blots

## Western Blots for Figure 1L

Full unedited gel for Figure\_1L, HA

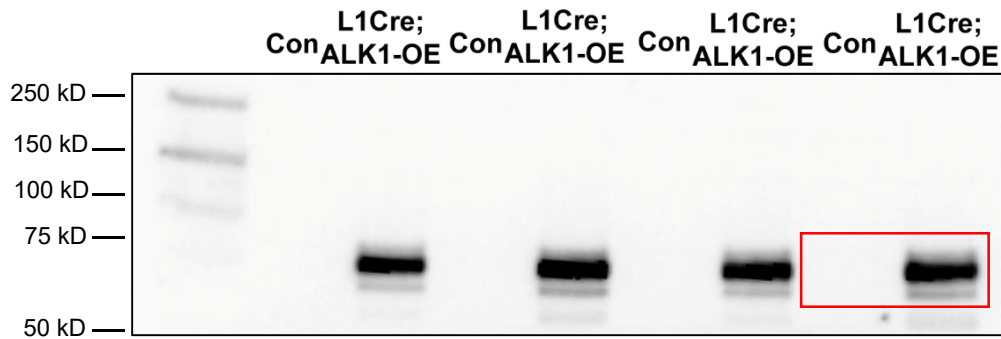

Full unedited gel for Figure\_1L, ALK1

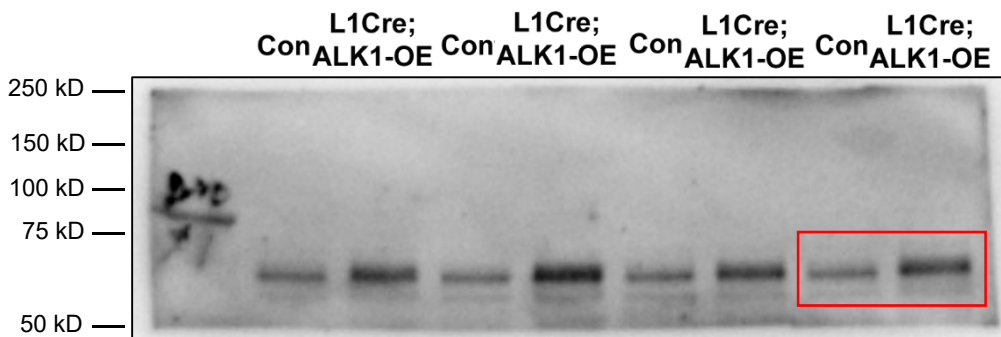

Full unedited gel for Figure\_1L,  $\beta$ -ACTIN

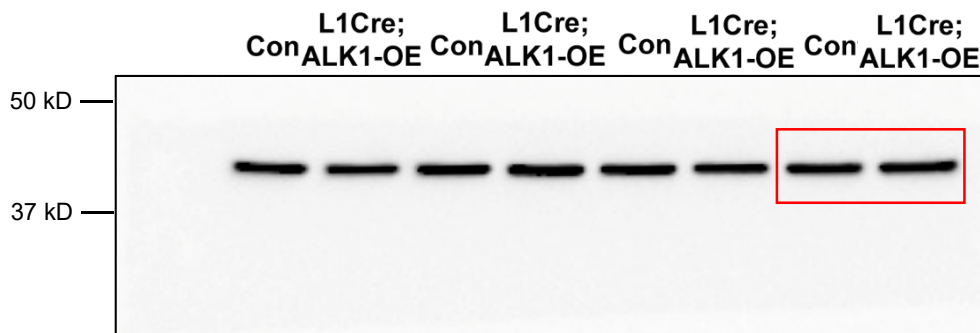

# Western Blots for Figure 7A

Full unedited gel for Online Figure\_7A ,pSMAD1,5,8

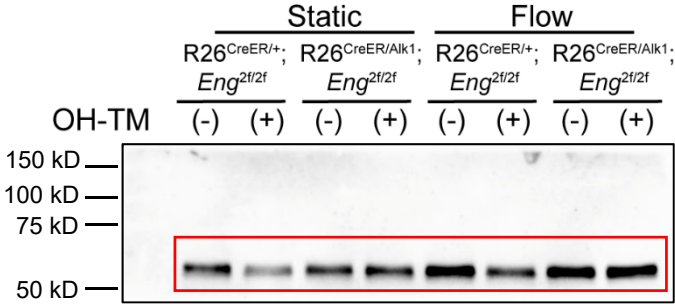

Full unedited gel for Online Figure\_7A, SMAD1

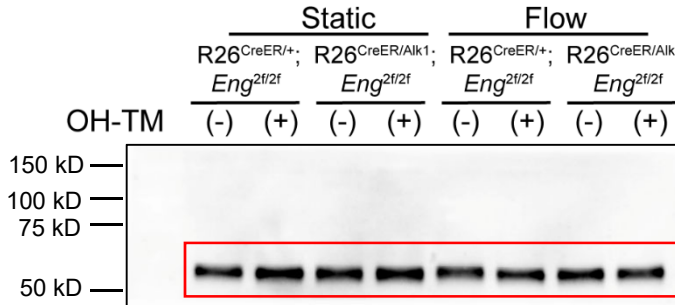

Full unedited gel for Online Figure\_7A, HA

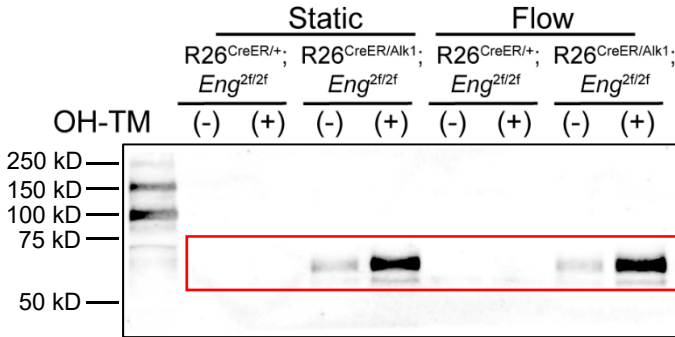

Full unedited gel for Online Figure\_7A, ENG

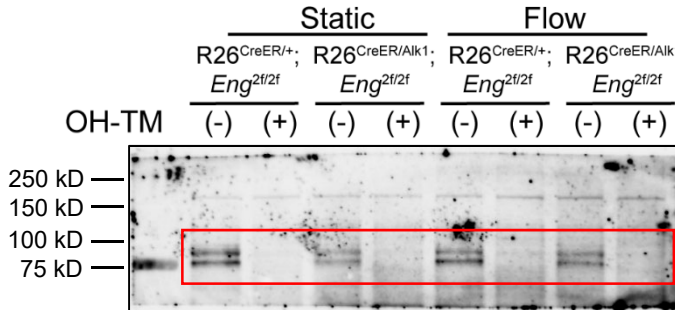

# Western Blots for Figure 7A

Full unedited gel for Online Figure\_7A,  $\beta$ -ACTIN

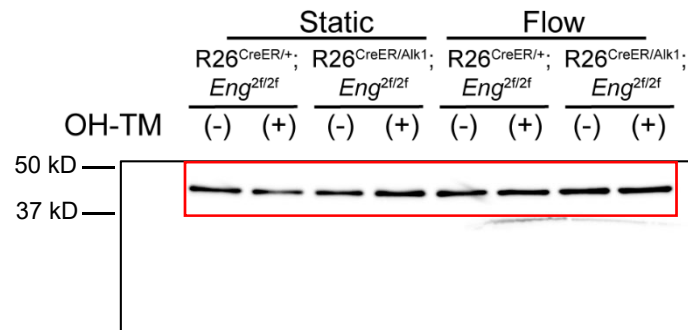

# Western Blots for Figure 7C

Full unedited gel for Figure\_7C left panel, pAKT

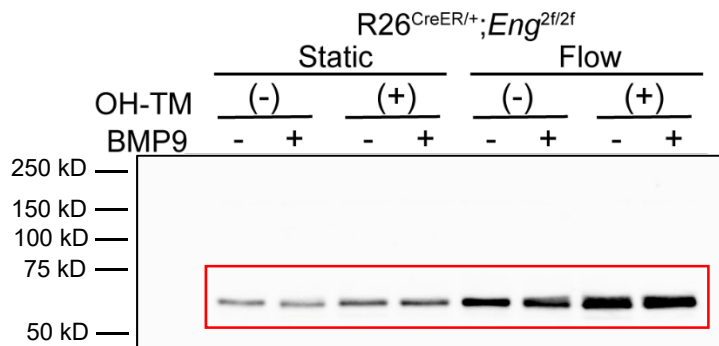

Full unedited gel for Figure\_7C left panel, AKT

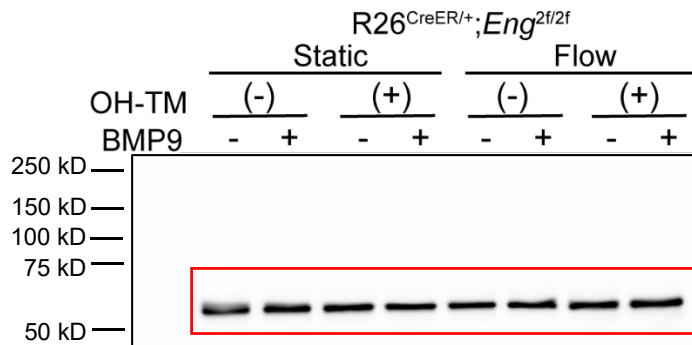

Full unedited gel for Figure\_7C left panel, ENG

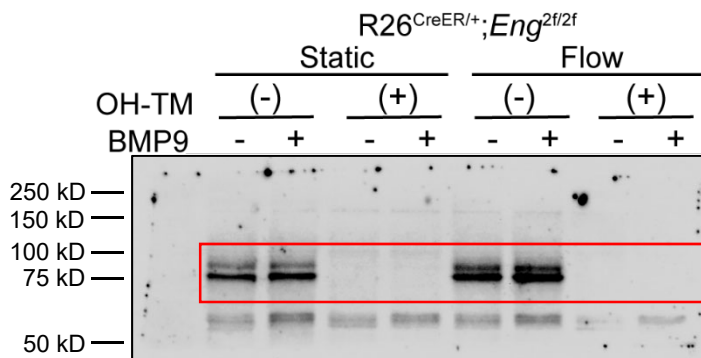

Full unedited gel for Figure\_7C left panel, β-ACTIN

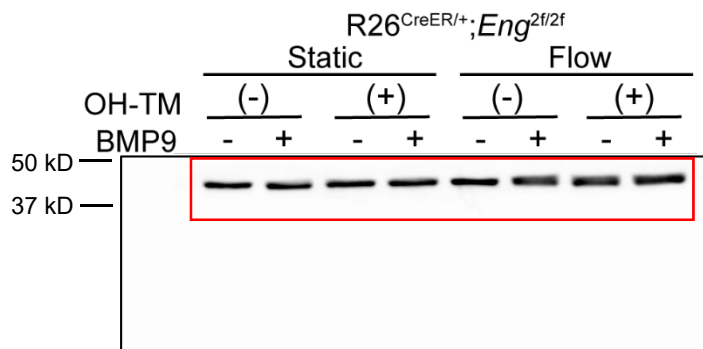

# Western Blots for Figure 7C

Full unedited gel for Figure\_7C right panel, pAKT

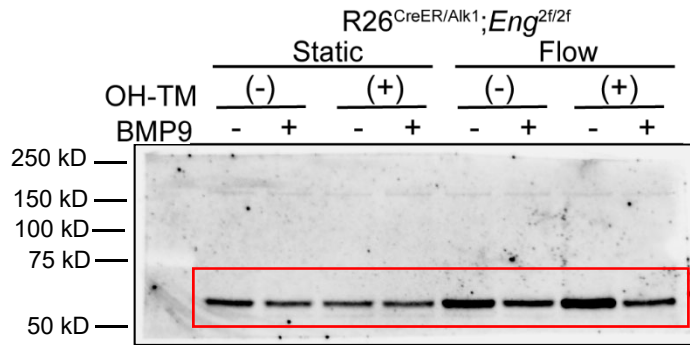

Full unedited gel for Figure\_7C right panel, AKT

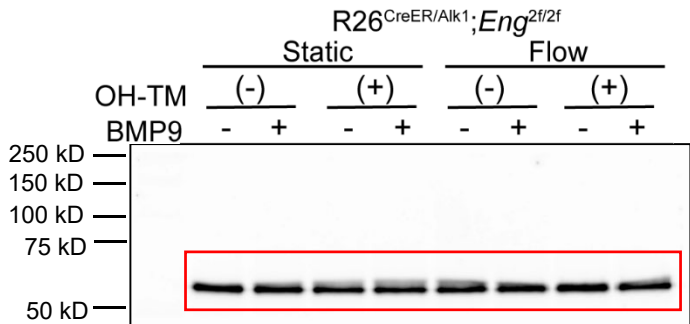

Full unedited gel for Figure\_7C right panel, ENG

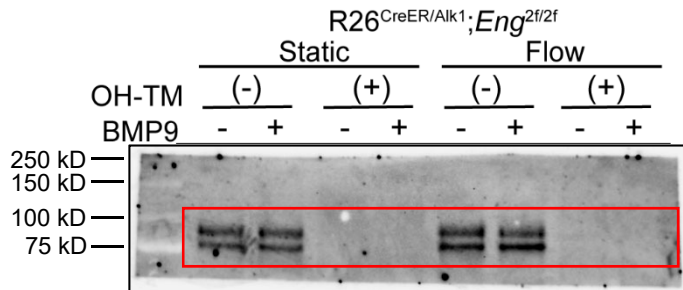

Full unedited gel for Figure\_7C right panel, β-ACTIN

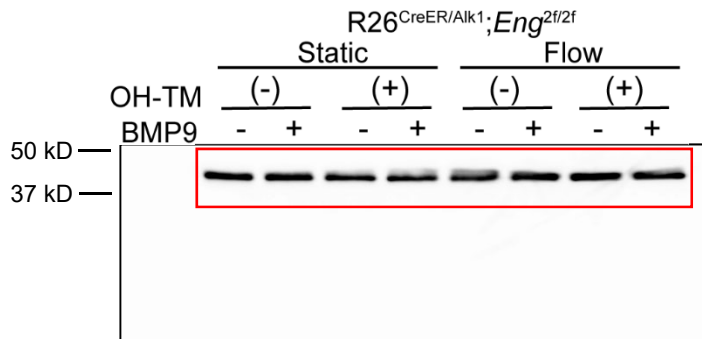

# Western Blots for Figure 7C

Full unedited gel for Figure\_7C right panel, HA

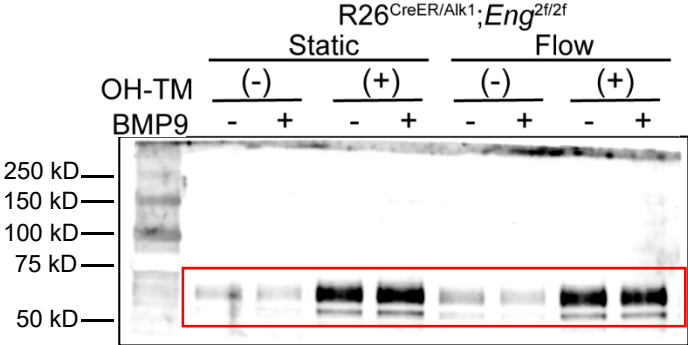

# Western Blots for Figure 8M

Full unedited gel for Figure\_8M left panel, ALK1

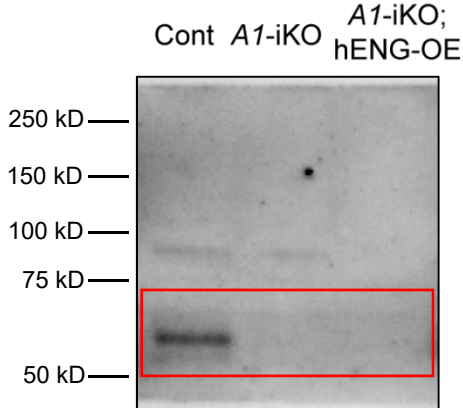

Full unedited gel for Figure\_8M left panel, hENG

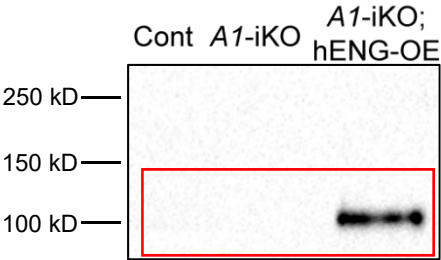

Full unedited gel for Figure\_8M left panel, mENG

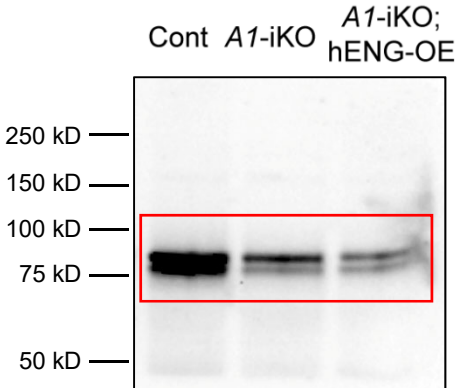

## Western Blots for Figure 8M

Full unedited gel for Figure\_8M right panel, pSMAD1,5,8

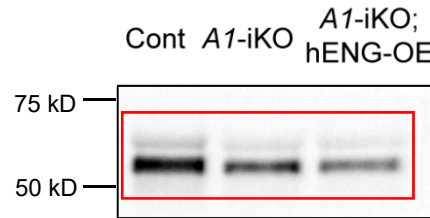

Full unedited gel for Figure\_8M right panel, SMAD1

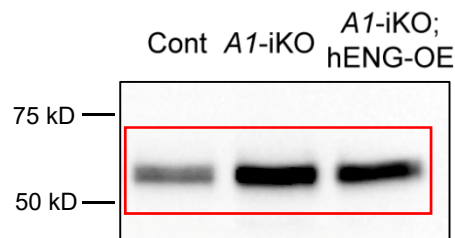

Full unedited gel for Figure\_8M right panel,  $\beta$ -ACTIN

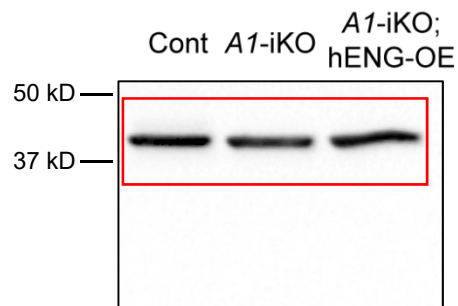



# Western Blots for Online Figure I F

Full unedited gel for Online Figure\_I F, HA

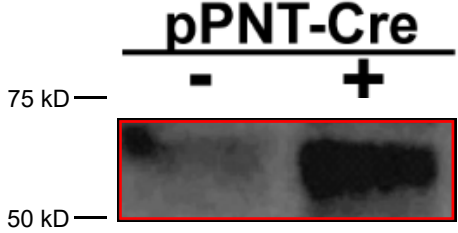

Full unedited gel for Online Figure\_I F,  $\beta$ -ACTIN

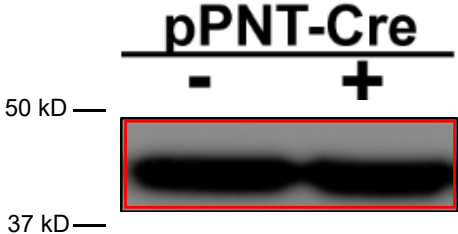

# Western Blots for Online Figure XIV B

Full unedited gel for Online Figure\_XIV B, HA

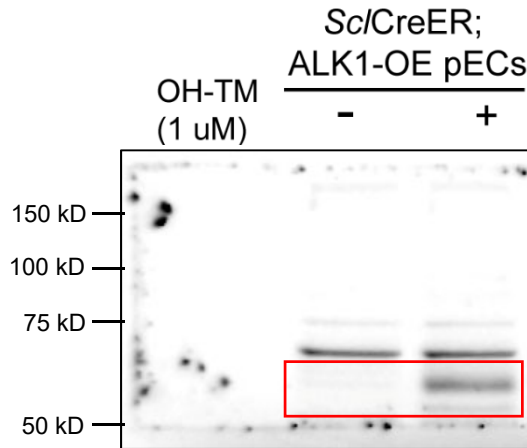

Full unedited gel for Online Figure\_XIV B, ALK1

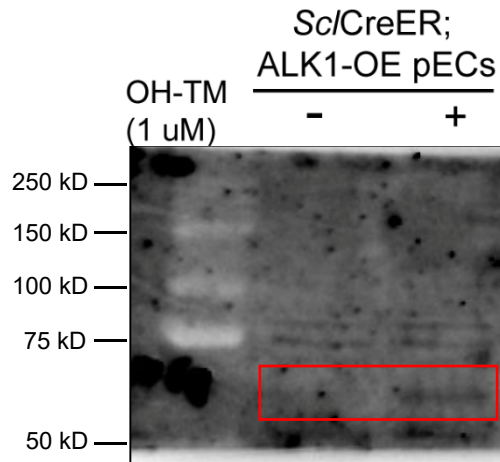

Full unedited gel for Online Figure\_XIV B,  $\beta$ -ACTIN

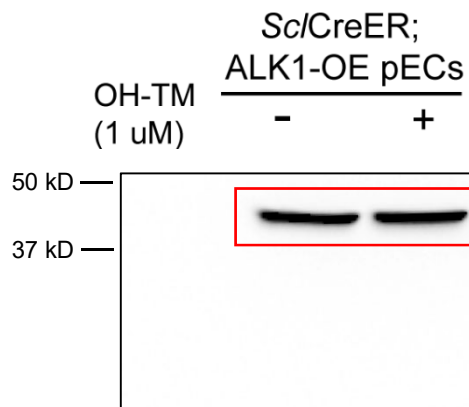

## Western Blots for Online Figure XIV D

Full unedited gel for Online Figure\_XIV D, pSMAD1,5,8

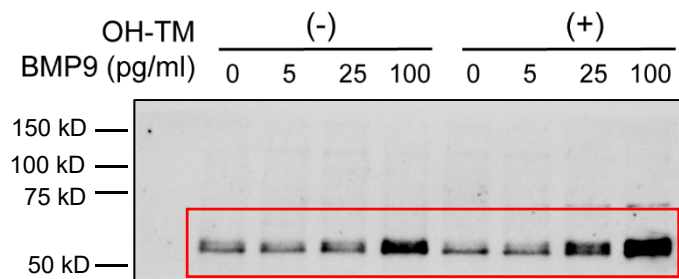

Full unedited gel for Online Figure\_XIV D, SMAD1

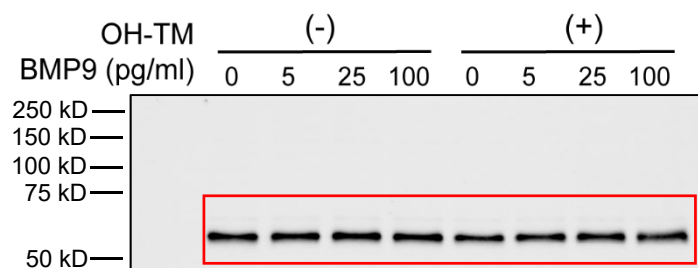

Full unedited gel for Online Figure\_XIV D, HA

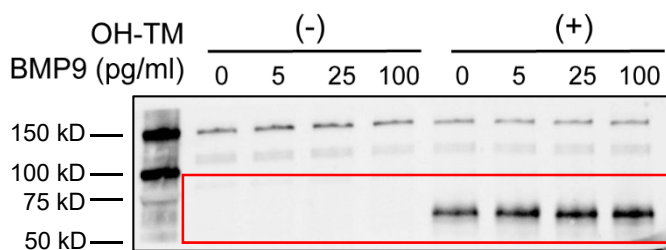

Full unedited gel for Online Figure\_XIV D,  $\beta$ -ACTIN

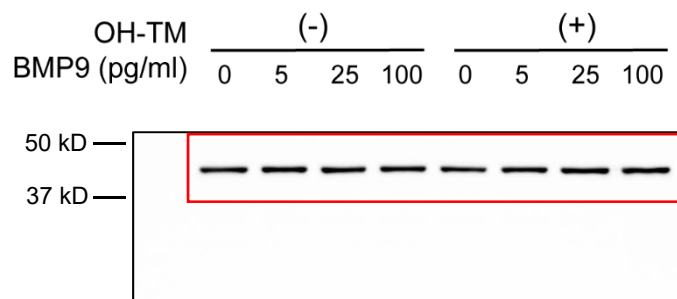

## Western Blots for Online Figure XIV F

Full unedited gel for Online Figure\_XIV F, pSMAD1,5,8

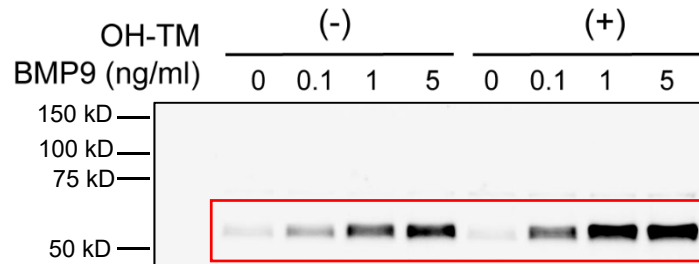

Full unedited gel for Online Figure\_XIV F, SMAD1

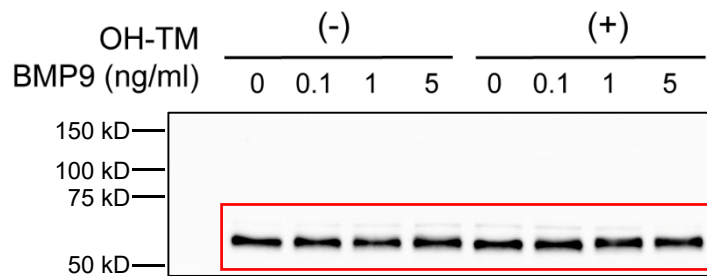

Full unedited gel for Online Figure\_XIV F, HA

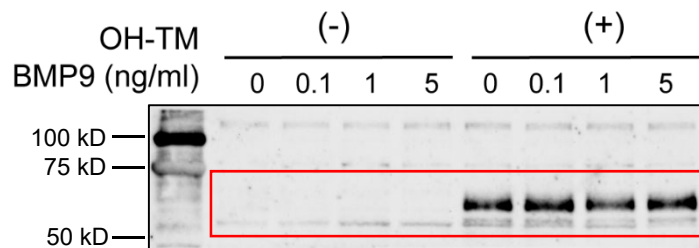

Full unedited gel for Online Figure\_XIV F,  $\beta$ -ACTIN

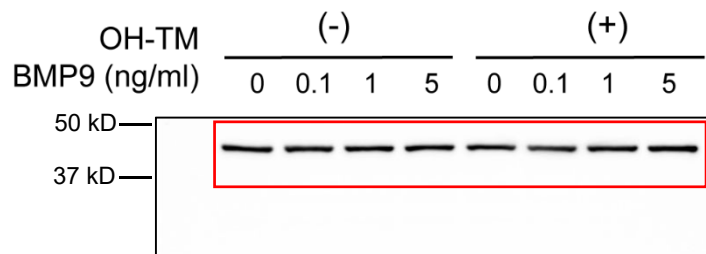

## Western Blots for Online Figure XIV H

Full unedited gel for Online Figure\_XIV H, pSMAD1,5,8

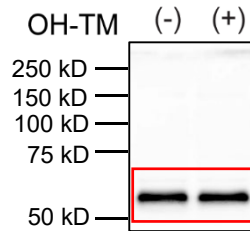

Full unedited gel for Online Figure\_XIV H, SMAD1

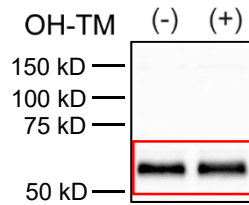

Full unedited gel for Online Figure\_XIV H, HA

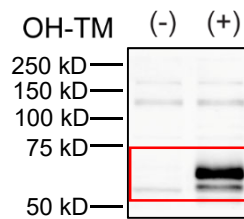

Full unedited gel for Online Figure\_XIV H,  $\beta$ -ACTIN

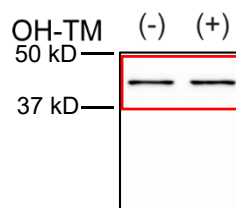

# Original Southern Blot

Southern Blots for Online Figure I B

Full unedited gel for Online Figure\_I B

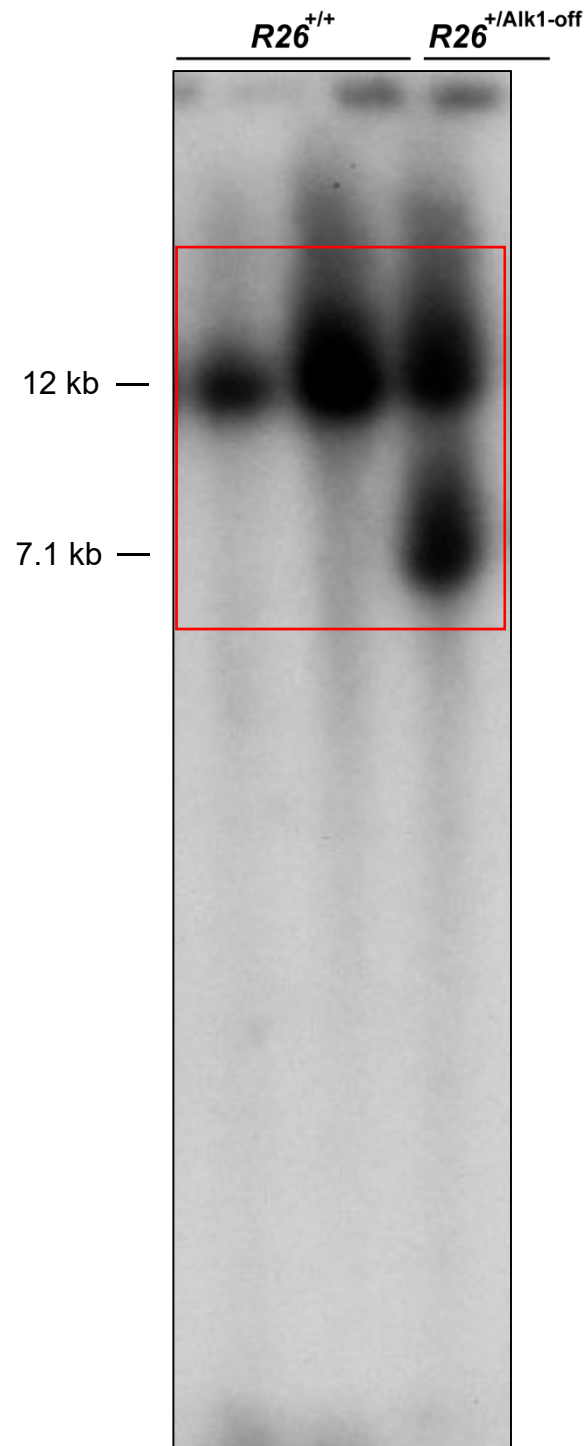

# Original Agarose gel

Genomic PCR for Online Figure I

Full unedited gel for Online Figure\_I D

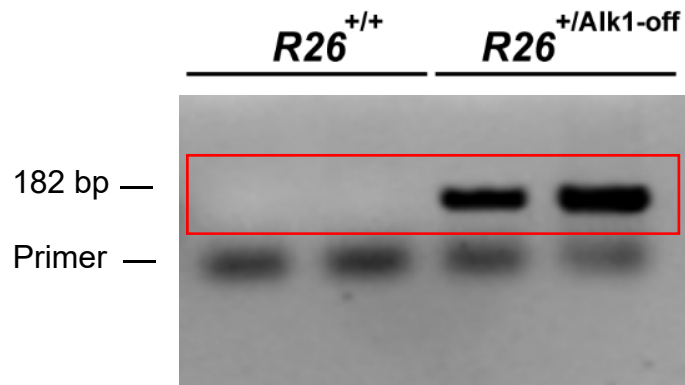

Full unedited gel for Online Figure\_I E

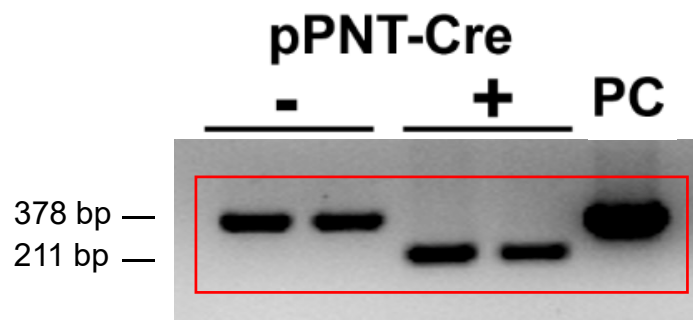

# Genomic PCR for Online Figure XIV A

Full unedited gel for Online Figure\_XIV A

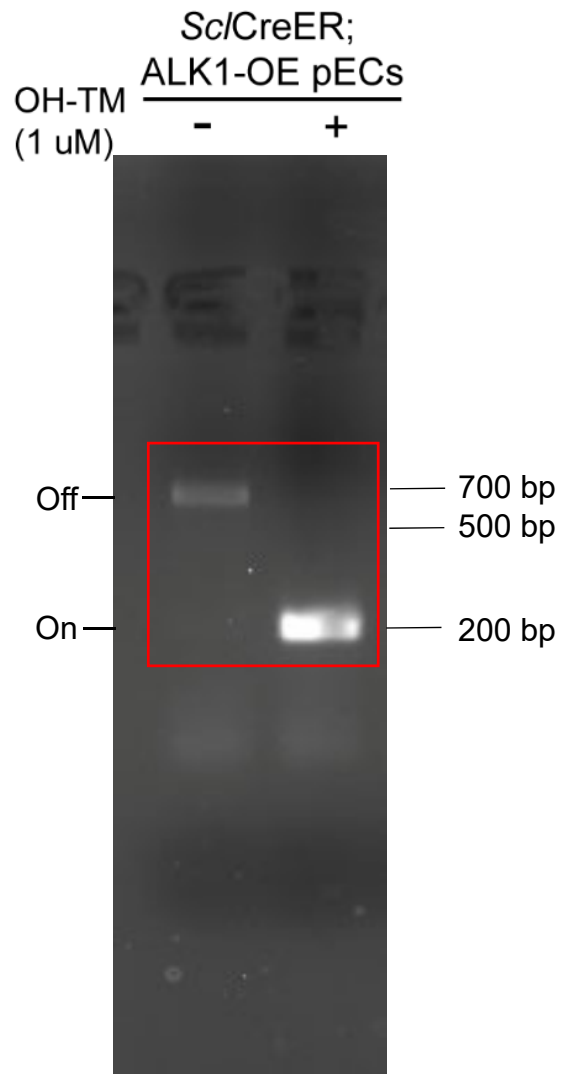



# RT-PCR for Online Figure\_XX C

Full unedited gel for Online Figure\_XX C

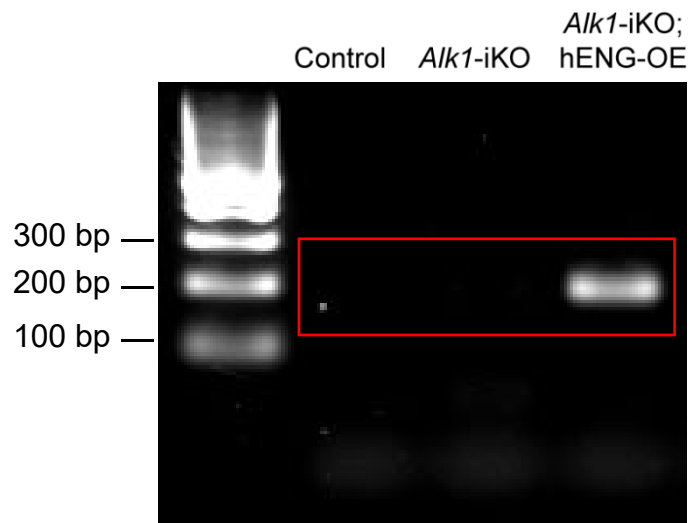

Full unedited gel for Online Figure\_XX C

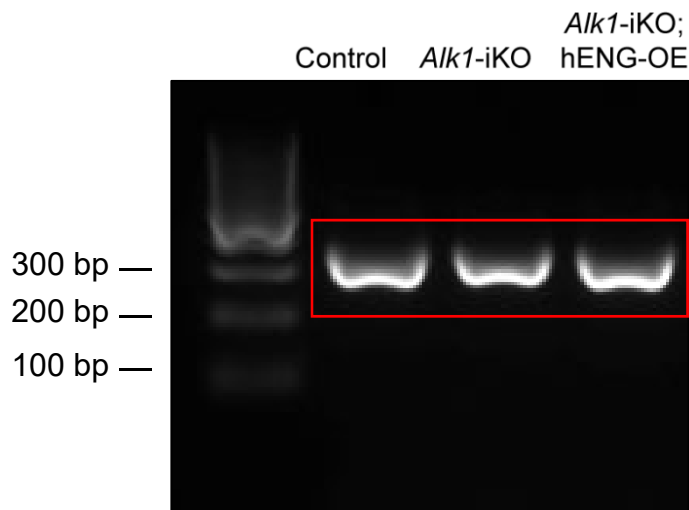

Supplement: NIHMS1617223-supplement-31667_Uncut_Gel_Blots.pdf [file NIHMS1617223-supplement-31667_Uncut_Gel_Blots.pdf]
