# Supplementary material
Source: PubMed Central journal article supplement (PMC7554133)
Supplement: NIHMS1617223-supplement-316267_Major_Resources_Table.pdf [file NIHMS1617223-supplement-316267_Major_Resources_Table.pdf]

## Major Resources Table

In order to allow validation and replication of experiments, all essential research materials listed in the Methods should be included in the Major Resources Table below. Authors are encouraged to use public repositories for protocols, data, code, and other materials and provide persistent identifiers and/or links to repositories when available. Authors may add or delete rows as needed.

### Animals (in vivo studies)

| Species | Vendor or Source | Background Strain | Sex   | Persistent ID / URL |
|---------|------------------|-------------------|-------|---------------------|
| Mice    | Shown below      | 129/B6 or B6/FVB  | M & F |                     |
|         |                  |                   |       |                     |

### Genetically Modified Animals

| Strains                                  | Vendor or Source               | Background Strain | Persistent ID / URL                                                                                                       |
|------------------------------------------|--------------------------------|-------------------|---------------------------------------------------------------------------------------------------------------------------|
| <i>Alk1</i> -floxed                      | SP Oh/UF                       | 129/B6            | <a href="https://www.ncbi.nlm.nih.gov/pmc/articles/PMC2200847/">https://www.ncbi.nlm.nih.gov/pmc/articles/PMC2200847/</a> |
| <i>Alk1</i> <sup>LacZ</sup>              | SP Oh/UF                       | 129/B6            | <a href="https://pubmed.ncbi.nlm.nih.gov/12970115/">https://pubmed.ncbi.nlm.nih.gov/12970115/</a>                         |
| <i>Alk1</i> <sup>GFP<sup>Cre</sup></sup> | SP Oh/UF                       | 129/B6            | <a href="https://www.ncbi.nlm.nih.gov/pmc/articles/PMC3802535/">https://www.ncbi.nlm.nih.gov/pmc/articles/PMC3802535/</a> |
| ROSA26 <sup>Alk1</sup>                   | YJ Lee/Gachon University       | 129/B6            | This manuscript is the first one reporting this strain.                                                                   |
| <i>Eng</i> -floxed                       | H Arthur/<br>New Castle        | 129/B6            | <a href="https://pubmed.ncbi.nlm.nih.gov/20224041/">https://pubmed.ncbi.nlm.nih.gov/20224041/</a>                         |
| Tg <i>Eng</i> <sup>loxP</sup>            | C Vary/Maine Medical Institute | 129/B6            | <a href="https://www.ncbi.nlm.nih.gov/pmc/articles/PMC2041841/">https://www.ncbi.nlm.nih.gov/pmc/articles/PMC2041841/</a> |
| ROSA26 <sup>CreER</sup>                  | Jackson Laboratory             | 129/B6            | <a href="https://www.jax.org/strain/008463">https://www.jax.org/strain/008463</a>                                         |
| Tg( <i>Myh11</i> -CreER)                 | Jackson Laboratory             | B6/FVB            | <a href="https://www.jax.org/strain/019079">https://www.jax.org/strain/019079</a>                                         |
| Tg( <i>Scf</i> -CreER)                   | CG Begley                      | B6/FVB            | <a href="https://pubmed.ncbi.nlm.nih.gov/15187022/">https://pubmed.ncbi.nlm.nih.gov/15187022/</a>                         |
|                                          |                                |                   |                                                                                                                           |

### Antibodies

| Target antigen | Vendor or Source | Catalog # | Working concentration    | Lot # (preferred but not required) | Persistent ID / URL                                                                                                                                                                                                                                                                             |
|----------------|------------------|-----------|--------------------------|------------------------------------|-------------------------------------------------------------------------------------------------------------------------------------------------------------------------------------------------------------------------------------------------------------------------------------------------|
| pAKT (Ser473)  | Cell Signaling   | 4060      | 1:1000                   |                                    | <a href="https://www.cellsignal.com/products/primary-antibodies/phospho-akt-ser473-d9e-xp-rabbit-mab/4060">https://www.cellsignal.com/products/primary-antibodies/phospho-akt-ser473-d9e-xp-rabbit-mab/4060</a>                                                                                 |
| pan AKT        | Cell Signaling   | 4691      | 1:1000                   |                                    | <a href="https://www.cellsignal.com/products/primary-antibodies/akt-pan-c67e7-rabbit-mab/4691">https://www.cellsignal.com/products/primary-antibodies/akt-pan-c67e7-rabbit-mab/4691</a>                                                                                                         |
| pSMAD1,5,8     | Cell Signaling   | 13820     | WB(1:1000),<br>IF(1:200) |                                    | <a href="https://www.cellsignal.com/products/primary-antibodies/phospho-smad1-ser463-465-smad5-ser463-465-smad9-ser465-467-d5b10-rabbit-mab/13820">https://www.cellsignal.com/products/primary-antibodies/phospho-smad1-ser463-465-smad5-ser463-465-smad9-ser465-467-d5b10-rabbit-mab/13820</a> |
| SMAD1          | Cell Signaling   | 9743      | 1:1000                   |                                    | <a href="https://www.cellsignal.com/products/primary-antibodies/smad1-antibody/9743">https://www.cellsignal.com/products/primary-antibodies/smad1-antibody/9743</a>                                                                                                                             |
| HA             | Covance          | MMS-101-R | 1:1000                   |                                    | <a href="https://www.biolegend.com/en-us/products/anti-ha-11-epitope-tag-antibody-11071">https://www.biolegend.com/en-us/products/anti-ha-11-epitope-tag-antibody-11071</a>                                                                                                                     |

|                                     |                          |                    |        |  |                                                                                                                                                                                                                                                                                                                                                                                   |
|-------------------------------------|--------------------------|--------------------|--------|--|-----------------------------------------------------------------------------------------------------------------------------------------------------------------------------------------------------------------------------------------------------------------------------------------------------------------------------------------------------------------------------------|
| HA                                  | Abcam                    | ab9110             | 1:4000 |  | <a href="https://www.abcam.com/ha-tag-antibody-chip-grade-ab9110.html">https://www.abcam.com/ha-tag-antibody-chip-grade-ab9110.html</a>                                                                                                                                                                                                                                           |
| mouse ENG                           | BD Biosciences           | 550546             | 1:100  |  | <a href="https://www.bdbiosciences.com/us/applications/research/stem-cell-research/hematopoietic-stem-cell-markers/mouse/positive-markers/purified-rat-anti-mouse-cd105-mj718/p/550546">https://www.bdbiosciences.com/us/applications/research/stem-cell-research/hematopoietic-stem-cell-markers/mouse/positive-markers/purified-rat-anti-mouse-cd105-mj718/p/550546</a>         |
| mouse ENG                           | Santa Cruz Biotechnology | sc-18893           | 1:100  |  | <a href="https://www.scbt.com/p/endoglin-antibody-mj7-18">https://www.scbt.com/p/endoglin-antibody-mj7-18</a>                                                                                                                                                                                                                                                                     |
| human ENG                           | BD Biosciences           | 611315             | 1:300  |  | <a href="https://www.bdbiosciences.com/us/applications/research/stem-cell-research/hematopoietic-stem-cell-markers/human/positive-markers/purified-mouse-anti-human-cd105-35cd105/p/611315">https://www.bdbiosciences.com/us/applications/research/stem-cell-research/hematopoietic-stem-cell-markers/human/positive-markers/purified-mouse-anti-human-cd105-35cd105/p/611315</a> |
| mouse ALK1                          | Santa Cruz Biotechnology | sc-19546           | 1:100  |  | <a href="https://www.scbt.com/p/alk-1-antibody-d-20">https://www.scbt.com/p/alk-1-antibody-d-20</a>                                                                                                                                                                                                                                                                               |
| mouse-ALK1                          | R&D systems              | AF770              | 1:200  |  | <a href="https://www.rndsystems.com/products/mouse-alk-1-antibody_af770">https://www.rndsystems.com/products/mouse-alk-1-antibody_af770</a>                                                                                                                                                                                                                                       |
| β-ACTIN                             | Sigma-Aldrich Co         | A1978              | 1:5000 |  | <a href="https://www.sigmaaldrich.com/catalog/search?term=A1978&amp;interface=All&amp;N=0+&amp;mode=partialmax&amp;lang=en&amp;region=US&amp;focus=product">https://www.sigmaaldrich.com/catalog/search?term=A1978&amp;interface=All&amp;N=0+&amp;mode=partialmax&amp;lang=en&amp;region=US&amp;focus=product</a>                                                                 |
| CD31                                | Biocare medical          | CM303              | 1:200  |  | <a href="https://biocare.net/product/cd31-rat-antibody/">https://biocare.net/product/cd31-rat-antibody/</a>                                                                                                                                                                                                                                                                       |
| cleaved CASPASE3                    | Cell Signaling           | 9661               | 1:200  |  | <a href="https://www.cellsignal.com/products/primary-antibodies/cleaved-caspase-3-asp175-antibody/9661">https://www.cellsignal.com/products/primary-antibodies/cleaved-caspase-3-asp175-antibody/9661</a>                                                                                                                                                                         |
| Ki67                                | Thermo Scientific        | RM-9106-S1         | 1:200  |  | <a href="https://www.thermofisher.com/order/catalog/product/RM-9106-R7#/RM-9106-R7">https://www.thermofisher.com/order/catalog/product/RM-9106-R7#/RM-9106-R7</a>                                                                                                                                                                                                                 |
| EMCN                                | Santa Cruz Biotechnology | sc-65495           | 1:200  |  | <a href="https://www.scbt.com/p/endomucin-antibody-v-7c7">https://www.scbt.com/p/endomucin-antibody-v-7c7</a>                                                                                                                                                                                                                                                                     |
| LYVE1                               | Novus Biologicals        | NB600-1008         | 1:200  |  | <a href="https://www.novusbio.com/products/lyve-1-antibody_nb600-1008">https://www.novusbio.com/products/lyve-1-antibody_nb600-1008</a>                                                                                                                                                                                                                                           |
| ERG1/2/3-647                        | Santa Cruz Biotechnology | sc-376293<br>AF647 | 1:100  |  | <a href="https://www.scbt.com/p/erg-1-2-3-antibody-c-1">https://www.scbt.com/p/erg-1-2-3-antibody-c-1</a>                                                                                                                                                                                                                                                                         |
| SMA-Cy3                             | Sigma-Aldrich Co         | C6198              | 1:200  |  | <a href="https://www.sigmaaldrich.com/catalog/product/sigma/c6198?lang=en&amp;region=US">https://www.sigmaaldrich.com/catalog/product/sigma/c6198?lang=en&amp;region=US</a>                                                                                                                                                                                                       |
| GFP                                 | Abcam                    | ab290              | 1:500  |  | <a href="https://www.abcam.com/gfp-antibody-chip-grade-ab290.html">https://www.abcam.com/gfp-antibody-chip-grade-ab290.html</a>                                                                                                                                                                                                                                                   |
| JAGGED1                             | R&D systems              | AF599              | 1:100  |  | <a href="https://www.rndsystems.com/products/rat-jagged-1-antibody_af599">https://www.rndsystems.com/products/rat-jagged-1-antibody_af599</a>                                                                                                                                                                                                                                     |
| HRP-conjugated sheep anti-mouse IgG | GE healthcare            | NA931V             |        |  | <a href="https://www.sigmaaldrich.com/catalog/product/sigma/gena9311ml?lang=en&amp;region=US">https://www.sigmaaldrich.com/catalog/product/sigma/gena9311ml?lang=en&amp;region=US</a>                                                                                                                                                                                             |

|                                       |                        |             |        |  |                                                                                                                                                                                                                                                                                   |
|---------------------------------------|------------------------|-------------|--------|--|-----------------------------------------------------------------------------------------------------------------------------------------------------------------------------------------------------------------------------------------------------------------------------------|
| HRP-conjugated donkey anti-rabbit IgG | GE healthcare          | NA934       | 1:5000 |  | <a href="https://www.sigmaaldrich.com/catalog/product/sigma/gena9341ml?lang=en&amp;region=US">https://www.sigmaaldrich.com/catalog/product/sigma/gena9341ml?lang=en&amp;region=US</a>                                                                                             |
| HRP-conjugated donkey anti-rat IgG    | Jackson ImmunoResearch | 712-036-153 | 1:5000 |  | <a href="https://www.jacksonimmuno.com/catalog/products/712-036-153">https://www.jacksonimmuno.com/catalog/products/712-036-153</a>                                                                                                                                               |
| HRP-conjugated donkey anti-goat IgG   | Jackson ImmunoResearch | 705-036-147 | 1:5000 |  | <a href="https://www.jacksonimmuno.com/catalog/products/705-036-147">https://www.jacksonimmuno.com/catalog/products/705-036-147</a>                                                                                                                                               |
| Alexa Fluor goat anti-rabbit AF 488   | Thermo Fisher          | A11070      | 1: 500 |  | <a href="https://www.thermofisher.com/antibody/product/Goat-anti-Rabbit-IgG-H-L-Cross-Adsorbed-Secondary-Antibody-Polyclonal/A-11070">https://www.thermofisher.com/antibody/product/Goat-anti-Rabbit-IgG-H-L-Cross-Adsorbed-Secondary-Antibody-Polyclonal/A-11070</a>             |
| Alexa Fluor donkey anti-rabbit AF 594 | Thermo Fisher          | A11072      | 1: 500 |  | <a href="https://www.thermofisher.com/antibody/product/Goat-anti-Rabbit-IgG-H-L-Cross-Adsorbed-Secondary-Antibody-Polyclonal/A-11072">https://www.thermofisher.com/antibody/product/Goat-anti-Rabbit-IgG-H-L-Cross-Adsorbed-Secondary-Antibody-Polyclonal/A-11072</a>             |
| Alexa Fluor donkey anti-goat AF 594   | Thermo Fisher          | A11058      | 1: 500 |  | <a href="https://www.thermofisher.com/antibody/product/Donkey-anti-Goat-IgG-H-L-Cross-Adsorbed-Secondary-Antibody-Polyclonal/A-11058">https://www.thermofisher.com/antibody/product/Donkey-anti-Goat-IgG-H-L-Cross-Adsorbed-Secondary-Antibody-Polyclonal/A-11058</a>             |
| Alexa Fluor donkey anti-rat AF 594    | Thermo Fisher          | A21209      | 1: 500 |  | <a href="https://www.thermofisher.com/antibody/product/Donkey-anti-Rat-IgG-H-L-Highly-Cross-Adsorbed-Secondary-Antibody-Polyclonal/A-21209">https://www.thermofisher.com/antibody/product/Donkey-anti-Rat-IgG-H-L-Highly-Cross-Adsorbed-Secondary-Antibody-Polyclonal/A-21209</a> |
| Alexa Fluor goat anti-rat AF 350      | Thermo Fisher          | A21093      | 1: 500 |  | <a href="https://www.thermofisher.com/antibody/product/Goat-anti-Rat-IgG-H-L-Cross-Adsorbed-Secondary-Antibody-Polyclonal/A-21093">https://www.thermofisher.com/antibody/product/Goat-anti-Rat-IgG-H-L-Cross-Adsorbed-Secondary-Antibody-Polyclonal/A-21093</a>                   |
| Alexa Fluor goat anti-rat AF 647      | Thermo Fisher          | A21247      | 1: 500 |  | <a href="https://www.thermofisher.com/antibody/product/Goat-anti-Rat-IgG-H-L-Cross-Adsorbed-Secondary-Antibody-Polyclonal/A-21247">https://www.thermofisher.com/antibody/product/Goat-anti-Rat-IgG-H-L-Cross-Adsorbed-Secondary-Antibody-Polyclonal/A-21247</a>                   |
| Alexa Fluor Streptavidin AF 594       | Thermo Fisher          | S11227      | 1: 500 |  | <a href="https://www.thermofisher.com/order/catalog/product/S11227#/S11227">https://www.thermofisher.com/order/catalog/product/S11227#/S11227</a>                                                                                                                                 |
| Alexa Fluor Streptavidin AF 405       | Thermo Fisher          | S 32351     | 1: 500 |  | <a href="https://www.thermofisher.com/order/catalog/product/S32351#/S32351">https://www.thermofisher.com/order/catalog/product/S32351#/S32351</a>                                                                                                                                 |

### DNA/cDNA Clones

| Clone Name                       | Sequence | Source / Repository                                                                                                                       | Persistent ID / URL                                                                                                                                                                                                                  |
|----------------------------------|----------|-------------------------------------------------------------------------------------------------------------------------------------------|--------------------------------------------------------------------------------------------------------------------------------------------------------------------------------------------------------------------------------------|
| pROSA-CAGGS-HA- <i>Alk1</i> -GFP |          | HA-tagged mouse <i>Alk1</i> was inserted into the pBSApBpACAGftIGn plasmid (1), and then finally sucloned into the pROSA26PAS plasmid (2) | 1. <a href="https://pubmed.ncbi.nlm.nih.gov/19023080/">https://pubmed.ncbi.nlm.nih.gov/19023080/</a><br>2. <a href="https://www.ncbi.nlm.nih.gov/pmc/articles/PMC1253836/">https://www.ncbi.nlm.nih.gov/pmc/articles/PMC1253836/</a> |

DOI [to be added]

|          |  |                                             |                                                                                                 |
|----------|--|---------------------------------------------|-------------------------------------------------------------------------------------------------|
| pPNT-Cre |  | The Cre gene was inserted into pPNT vector. | <a href="https://pubmed.ncbi.nlm.nih.gov/2065352/">https://pubmed.ncbi.nlm.nih.gov/2065352/</a> |
|          |  |                                             |                                                                                                 |

### Cultured Cells

| Name                              | Vendor or Source                              | Sex (F, M, or unknown) | Persistent ID / URL                                                                                                                                   |
|-----------------------------------|-----------------------------------------------|------------------------|-------------------------------------------------------------------------------------------------------------------------------------------------------|
| Mouse pulmonary Endothelial Cells | Home-made                                     | Unknown                |                                                                                                                                                       |
| Mouse J1 Embryonic Stem Cells     | The cell line was kindly gifted from Dr. E Li | M                      | <a href="https://www.atcc.org/products/all/SCRC-1010.aspx#generalinformation">https://www.atcc.org/products/all/SCRC-1010.aspx#generalinformation</a> |
|                                   |                                               |                        |                                                                                                                                                       |

### Data & Code Availability

| Description | Source / Repository | Persistent ID / URL |
|-------------|---------------------|---------------------|
|             |                     |                     |
|             |                     |                     |
|             |                     |                     |

### Other

| Description | Source / Repository | Persistent ID / URL |
|-------------|---------------------|---------------------|
|             |                     |                     |
|             |                     |                     |
|             |                     |                     |
